# Supplementary material
Source: publisher figshare collection journal article supplement (https://frontiersin.figshare.com/ndownloader/files/23425892)

**Supplementary Figure 6.** Shoot and root dry matter of pigeon pea seedlings with AMF, PGPR, AMG+PGPR, and no inoculation. Six polybag seedlings of pigeon pea were randomly sampled from each of the four treatments namely: No inoculation, AMF, PGPR, AMF+PGPR, dry weights of shoots and roots were measured based on the oven dried weights. Shoot and root dry matter contents of pre-cultured pigeon pea seedlings in polythene bag inoculated with AMF+PGPR alone or in combination of AMF and PGPR in Bangalore and Kolli Hills for the two cropping seasons 2014-15 and 2015-16. The inoculation effect is compared with the no inoculation. Each error bar indicates +1 standard deviation of the mean. Bars not sharing the same letters are significantly different at  $p < 0.05$ .

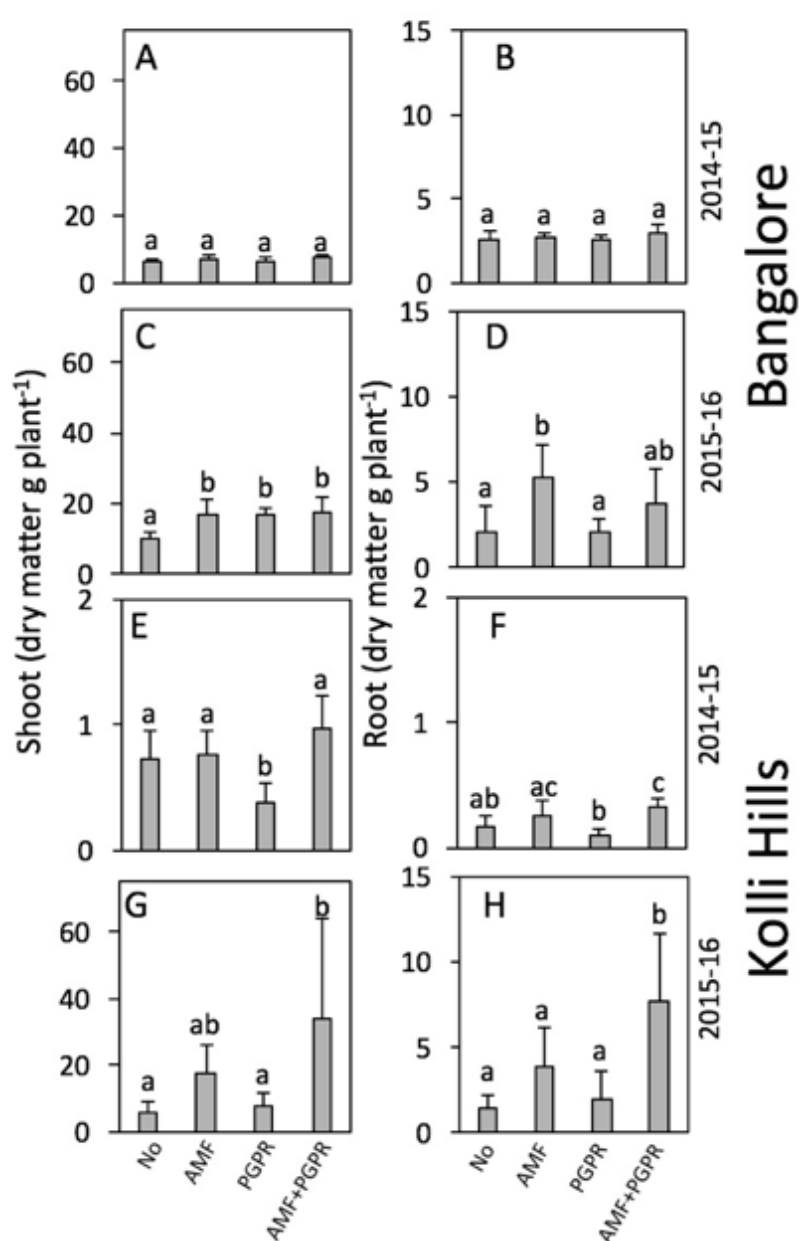

Supplement: Supplementary file 1 [file 23425892]
